# Supplementary material for: Amnion Epithelial Cells Promote Lung Repair via Lipoxin A4
Source: PubMed Central journal article supplement (PMC5442827; doi:10.5966/sctm.2016-0077), 2016-11-07
Supplement: SCT3-6-1085-s001.pdf [file SCT3-6-1085-s001.pdf]

1

2 Supplemental Figure – Lim et al.

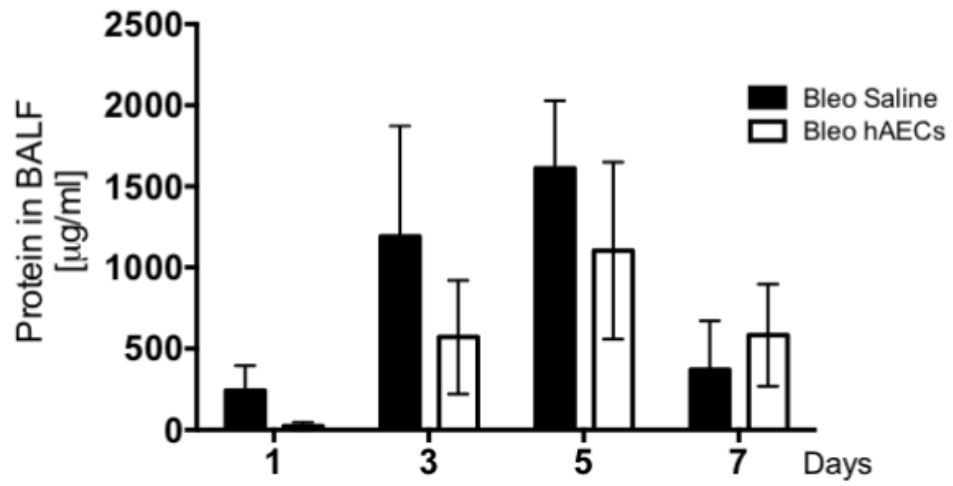

3

4 **Figure S1.** Protein concentration from bronchoalveolar lavage fluid collected showed no  
5 significant difference between both groups across all days (S1).
